# Supplementary material
Source: HighWire-hosted journal article supplement (https://erj.ersjournals.com/content/59/3/2101399)
Supplement: inline-supplementary-material-1 [file inline-supplementary-material-1.pdf]

**Supplemental figure S1.** Flow diagram showing participants selection process in this study

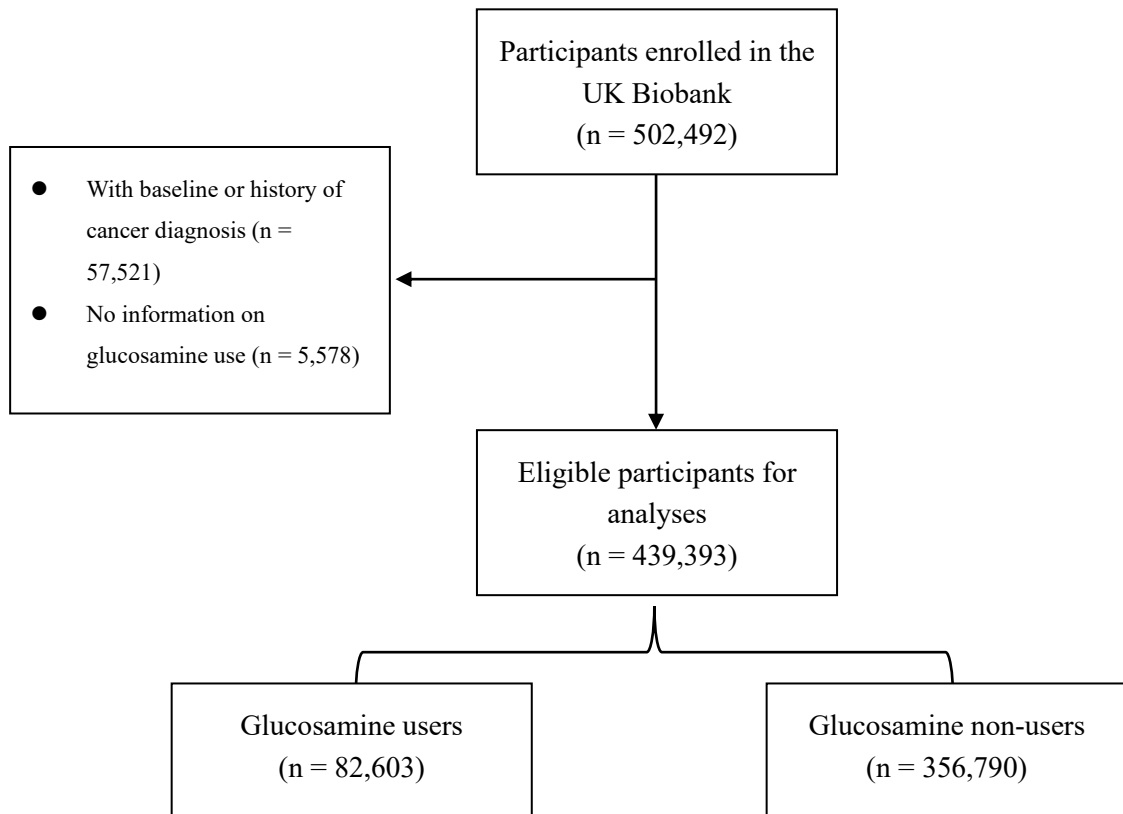

**Supplemental Figure S2.** Cumulative incidence curves for the marginal probability of lung cancer in the presence of competing events between glucosamine users and non-users

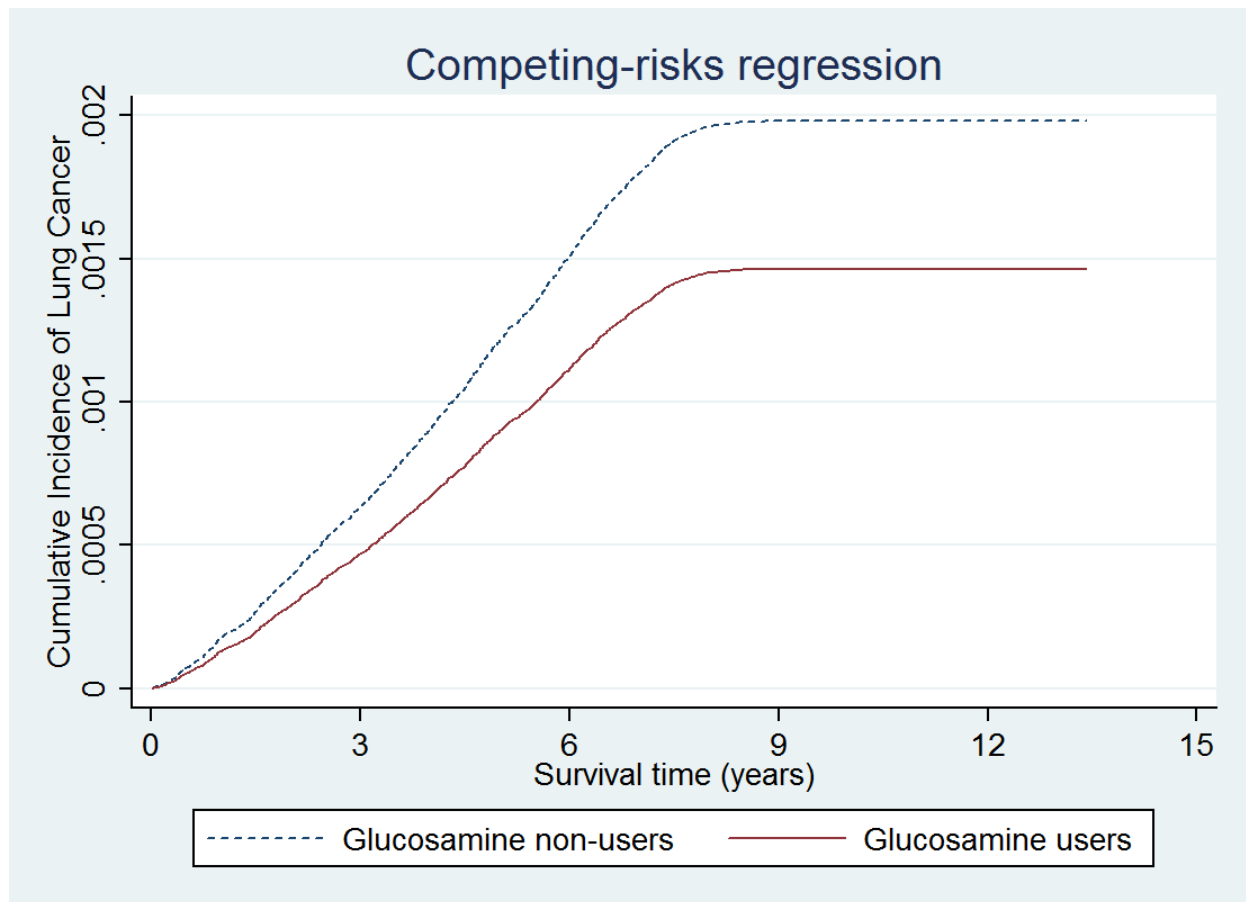

**Supplemental Table S1.** Results for the relationship between glucosamine use and lung cancer risk according to quartiles of FEV1\*

| Quartiles of FEV1 <sup>#</sup> | Glucosamine users      |                             | Glucosamine non-users  |                             | Hazard ratio (95% CI) |
|--------------------------------|------------------------|-----------------------------|------------------------|-----------------------------|-----------------------|
|                                | Number of participants | Number of lung cancer cases | Number of participants | Number of lung cancer cases |                       |
| Q1                             | 21,488                 | 122                         | 77,794                 | 655                         | 0.87 (0.82 - 0.93)    |
| Q2                             | 20,811                 | 74                          | 80,051                 | 352                         | 0.85 (0.73 - 0.98)    |
| Q3                             | 17,810                 | 40                          | 83,025                 | 235                         | 0.88 (0.64 - 1.20)    |
| Q4                             | 15,935                 | 29                          | 84,918                 | 138                         | 0.84 (0.53 - 1.31)    |

\* model adjusted for age, ethnicity, sex, family history of lung cancer, education, annual income, Townsend Deprivation Index, smoking and drinking, BMI, physical activity, fruit and vegetable intake, health condition, NSAID use, chondroitin use and nutrient supplementation

<sup>#</sup> if  $0 \leq \text{FEV1} < 2.28$  liters, then participants were grouped into Q1; if  $2.28 \leq \text{FEV1} < 2.76$ , then participants were grouped into Q2; if  $2.76 \leq \text{FEV1} < 3.35$ , then participants were grouped into Q3; if  $\text{FEV1} \geq 3.35$ , then participants were grouped into Q4

**Supplemental table S2.** Results from sensitivity analyses for the relationship between glucosamine use and risk of lung cancer and lung cancer mortality

| Sensitivity analysis                                    | HR (95% CI)        | P-value |
|---------------------------------------------------------|--------------------|---------|
| <b>Lung cancer</b>                                      |                    |         |
| Performing competing risk analysis <sup>1</sup>         | 0.83 (0.74 - 0.92) | < 0.001 |
| Excluding participants taking chondroitin <sup>2</sup>  | 0.85 (0.77 - 0.94) | < 0.001 |
| Using multiple imputation for missing data <sup>3</sup> | 0.81 (0.71 - 0.92) | 0.003   |
| Adjusting for propensity score <sup>3,4</sup>           | 0.79 (0.69 - 0.91) | < 0.001 |
| <b>Lung cancer mortality</b>                            |                    |         |
| Excluding participants taking chondroitin <sup>2</sup>  | 0.87 (0.78 - 0.95) | 0.006   |
| Using multiple imputation for missing data <sup>3</sup> | 0.85 (0.75 - 0.94) | 0.008   |
| Adjusting for propensity score <sup>3,4</sup>           | 0.90 (0.79 - 0.98) | 0.010   |

HR = hazard ratio; CI = confidence interval

<sup>1</sup> there were 13,592 deaths as competing events for lung cancer; model adjusted for age, ethnicity, sex, family history of lung cancer, education, annual income, Townsend Deprivation Index, smoking and drinking, BMI, physical activity, fruit and vegetable intake, health condition, NSAID use, chondroitin use, FEV1, and nutrient supplementation

<sup>2</sup> there were 5,530 chondroitin users excluded for analyses; model adjusted for age, ethnicity, sex, family history of lung cancer, education, annual income, Townsend Deprivation Index, smoking and drinking, BMI, physical activity, fruit and vegetable intake, health condition, NSAID use, FEV1, and nutrient supplementation

<sup>3</sup> propensity score was calculated based on logistic regression with independent variables including age, ethnicity, sex, family history of lung cancer, education, annual income, Townsend Deprivation Index, smoking and drinking, physical activity, fruit and vegetable intake, arthritis, use of NSAIDs and chondroitin, FEV1, and nutrient supplementation

<sup>4</sup> model adjusted for age, ethnicity, sex, family history of lung cancer, education, annual income, Townsend Deprivation Index, smoking and drinking, BMI, physical activity, fruit and vegetable intake, health condition, NSAID use, chondroitin use, FEV1, and nutrient supplementation
